# Supplementary material
Source: publisher site journal article supplement (https://www.spandidos-publications.com/6093/downloadSupplementary)

Figure S1. Forest plot for overall survival.

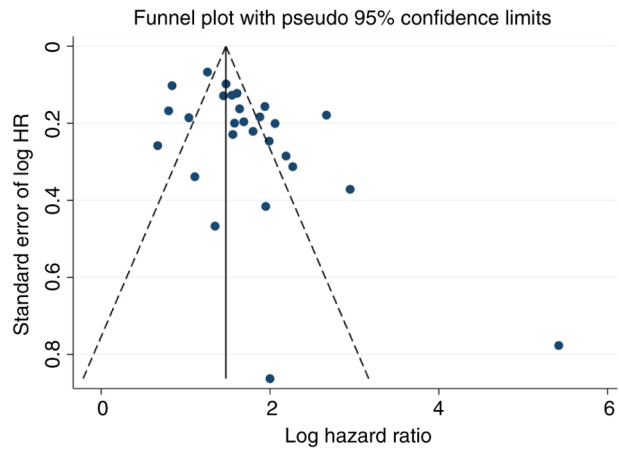

Figure S2. Forest plot for recurrence free survival.

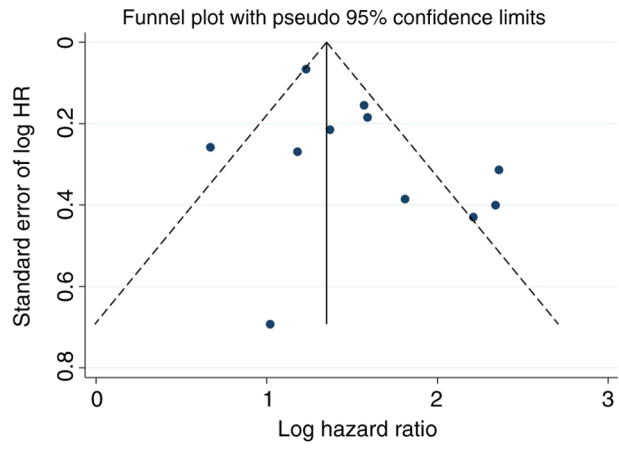

Supplement: Supplementary file 1 [file downloadSupplementary]
